## NEUROENDOCRINE REGULATION OF OSMOREGULATION AND THE EVOLUTION OF AIR-BREATHING IN DECAPOD CRUSTACEANS

STEPHEN MORRIS

*Morlab, School of Biological Sciences, University of Bristol, BS8 1UG, UK*

e-mail: Steve.Morris@bristol.ac.uk

*Accepted 1 December 2000; published on WWW 12 February 2001*

### Summary

Gills are the primary organ for salt transport, but in land crabs they are removed from water and thus ion exchanges, as well as CO<sub>2</sub> and ammonia excretion, are compromised. Urinary salt loss is minimised in land crabs by redirecting the urine across the gills where salt reabsorption occurs. Euryhaline marine crabs utilise apical membrane branchial Na<sup>+</sup>/H<sup>+</sup> and Cl<sup>-</sup>/HCO<sub>3</sub><sup>-</sup> exchange powered by a basal membrane Na<sup>+</sup>/K<sup>+</sup>-ATPase, but in freshwater crustaceans an apical V-ATPase provides for electrogenic uptake of Cl<sup>-</sup> in exchange for HCO<sub>3</sub><sup>-</sup>. The HCO<sub>3</sub><sup>-</sup> is provided by carbonic anhydrase facilitating CO<sub>2</sub> excretion while NH<sub>4</sub><sup>+</sup> can substitute for K<sup>+</sup> in the basal ATPase and for H<sup>+</sup> in the apical exchange. Gecarcinid land crabs and the terrestrial anomuran *Birgus latro* can lower the NaCl concentration of the urine to 5% of that of the haemolymph as it passes across the gills. This provides a filtration–reabsorption system analogous to the vertebrate kidney.

Crabs exercise hormonal control over branchial transport processes. Aquatic hyper-regulators release neuroamines from the pericardial organs, including dopamine and 5-hydroxytryptamine (5-HT), which via a cAMP-mediated phosphorylation stimulate Na<sup>+</sup>/K<sup>+</sup>-

ATPase activity and NaCl uptake. Freshwater species utilise a V-ATPase, and additional mechanisms of control have been suggested. Crustacean hyperglycaemic hormone (CHH) has now also been confirmed to have effects on hydromineral regulation, and a putative role for neuropeptides in salt and water balance suggests that current models for salt regulation are probably incomplete.

In a terrestrial crabs there may be controls on both active uptake and diffusive loss. The land crab *Gecarcoidea natalis* drinking saline water for 3 weeks reduced net branchial Na<sup>+</sup> uptake but not Na<sup>+</sup>/K<sup>+</sup>-ATPase activity, thus implying a reduction in diffusive Na<sup>+</sup> loss. Further, in *G. natalis* Na<sup>+</sup> uptake and Na<sup>+</sup>/K<sup>+</sup>-ATPase were stimulated by 5-HT independently of cAMP. Conversely, in the anomuran *B. latro*, branchial Na<sup>+</sup> and Cl<sup>-</sup> uptake and Na<sup>+</sup>/K<sup>+</sup>-ATPase are inhibited by dopamine, mediated by cAMP. There has been a multiple evolution of a kidney-type system in terrestrial crabs capable of managing salt, CO<sub>2</sub> and NH<sub>3</sub> movements.

Key words: land crab, ion regulation, air-breathing, monoamine, osmoregulation.

### Introduction

The maintenance of salt and water balance is clearly a different challenge for air-breathing animals compared to aquatic species, while for aquatic species, living in fresh water presents far greater ionic and osmotic problems than life in sea water. The evolution to life on land must pass through a transitional phase in which the animals are truly amphibious species and must survive alternately in air and water.

Crustaceans provide a spectrum of extant study species, from fully aquatic through a range of amphibious to fully terrestrial. The evolution of air-breathing has occurred in several crustacean lineages including both the brachyuran and anomuran decapod crabs (Hartnoll, 1988). Amphibious crustaceans are found in intertidal regions, brackish water estuaries and in freshwater lakes and rivers, and it appears that crabs have moved into the terrestrial habitat both directly from the ocean, via the intertidal, and through a variety of freshwater

habitats (Greenaway, 1988). However, even the most terrestrial crustaceans remain relatively permeable to water (Greenaway, 1994) and are restricted in their activity to periods of relatively high humidity.

Wolcott observes and comments: “Because little has appeared on the endocrine control mechanisms for water and salt balance since the work of Dorothy Bliss and her colleagues, my focus will be at the whole-animal level” (Wolcott, 1992; see Bliss, 1968, for a review). There were important studies in that interim period (e.g. Savage and Robinson, 1983; Mantel, 1985; Charmanier et al., 1984) but during the 10 years since Wolcott made this observation there have been notable investigations into the possible control mechanisms, and both generalisations and newly defined questions have emerged, especially in relation to the radiation of crabs onto land.

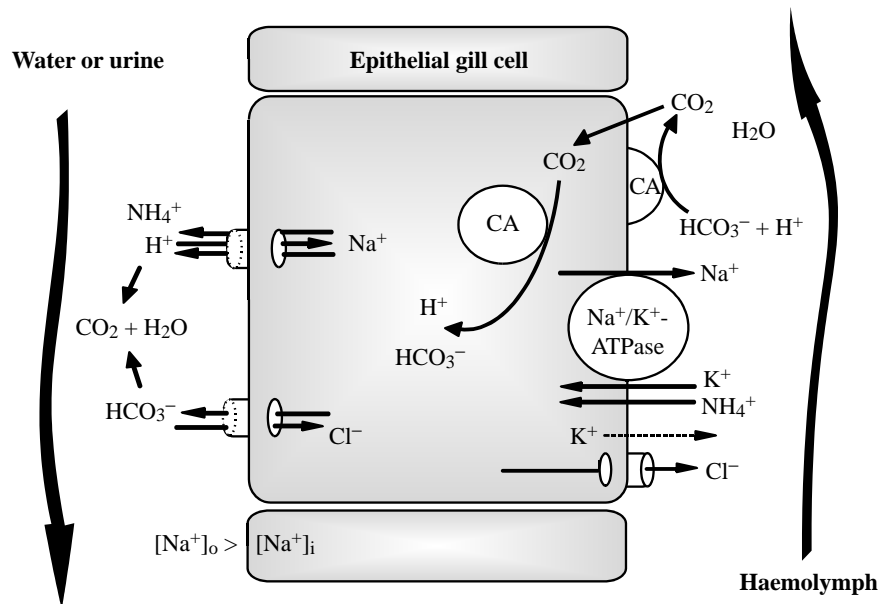

Fig. 1. Model of gill epithelial ion exchange mechanisms typical for a marine euryhaline crab, but also the basic model for terrestrial crustaceans of marine ancestry, showing the apical exchange of  $\text{HCO}_3^-$  for  $\text{Cl}^-$  and  $\text{H}^+$  for  $\text{Na}^+$  and linkage between the  $\text{CO}_2$  and ammonia excretion systems and salt uptake. CA, carbonic anhydrase.

In marine crabs the gills represent the primary organ for salt transport, while in freshwater species this branchial pumping is supplemented by salt reclamation from the urine within the antennal organs. The gills of freshwater crabs must work considerably harder than those of marine crabs at maintaining body salt concentrations against a high outward gradient for diffusive salt loss. Removing the gills from contact with water, by moving into air, prevents any branchial ion exchange with water. In addition, the other branchial exchanges linked to the ion pumping, such as  $\text{CO}_2$  and  $\text{NH}_3/\text{NH}_4^+$  excretion, and thereby acid-base balance, are also severely compromised. Terrestrial crabs must either satisfactorily deal with branchial ion exchange so that these other processes can continue, or separate them from their linkage with salt balance.

The different physical properties of air and water as respiratory media require morphological and physiological adaptations for gas exchange. Terrestrial crabs have developed progressively more elaborate lungs while their gill area has decreased from near  $1000 \text{ mm}^2 \text{ g}^{-1}$  body mass to less than  $200 \text{ mm}^2 \text{ g}^{-1}$  body mass. These lungs are formed by the elaboration and vascularisation of the lining of the branchial chamber (e.g. Farrelly and Greenaway, 1987; Farrelly and Greenaway, 1993). Gills are retained in air-breathing crabs as an important part of the ion-regulatory system. Some of the more terrestrial crab species are capable of redirecting their urine from the antennal gland to the branchial chambers where salt reabsorption occurs across the gills (Wolcott and Wolcott, 1985; Wolcott and Wolcott, 1991; Greenaway and Morris, 1989; Wolcott, 1992; Morris et al., 1991; Morris et al., 2000). Ghost crabs additionally utilise the ion-exchange mechanisms within the antennal gland to retain salts (DeVries and Wolcott, 1993; DeVries et al., 1994). A variety of mechanisms have been adopted to maintain  $\text{CO}_2$  and nitrogen excretion, involving both the antennal gland (e.g. DeVries and Wolcott,

1993) and the gills (e.g. Varley and Greenaway, 1994) in different species (see below).

#### Branchial mechanisms in aquatic species

Marine crustaceans are essentially isosmotic with sea water and the primary osmolytes in the haemolymph are  $\text{Na}^+$  and  $\text{Cl}^-$ ; water and ion fluxes are thereby minimised. Euryhaline marine species are capable of penetrating into estuaries and brackish water and employ branchial pumping mechanisms to maintain ion balance (Lucu, 1990). The generally accepted model for the pump system in the gill epithelial cells includes  $\text{Na}^+/\text{H}^+$  and  $\text{Cl}^-/\text{HCO}_3^-$  exchangers that direct  $\text{Na}^+$  and  $\text{Cl}^-$  into the cell over the apical membrane (Fig. 1) (see Péqueux and Gilles, 1988, for a review). In circumstances where the external  $\text{Na}^+$  concentrations are greater than those of the cytoplasm, hyper-regulation in diluted sea water is apparently powered by a basal membrane  $\text{Na}^+/\text{K}^+$ -ATPase (Fig. 1).

A number of recent studies have confirmed the importance and role of the  $\text{Na}^+/\text{K}^+$ -ATPase. For example, in *Carcinus maenas* transferred to dilute sea water the activity of  $\text{Na}^+/\text{K}^+$ -ATPase in the posterior gills increased fourfold, partly due to synthesis of new ATPase protein (Lucu and Flik, 1999). Similarly, in the intertidal *Hemigrapsus nudus* and *Leptograpsus variegatus* the ATPase approximately doubled in activity when the crabs were exposed to 50% sea water (Corotto and Holliday, 1996; Cooper and Morris, 1997). Thus there is a clear link between the extent of hyper-regulation and the activity of the basal membrane pump.

The mechanisms for branchial  $\text{Na}^+$  and  $\text{Cl}^-$  transport in freshwater crustaceans are less clear. When the external  $\text{NaCl}$  concentration becomes significantly less than that of the epithelial cells then simple apical exchange of  $\text{H}^+$  for  $\text{Na}^+$  must cease, thereby making an electrogenic motive force necessary. However, recent models (Fig. 2) seem to agree on some basic components. For example, studies of the Chinese mitten crab

Fig. 2. Generalised model for branchial transport mechanisms in freshwater decapods, based largely on findings for *Eriocheir sinensis* (Onken and Putzenlechner, 1995), showing the requirement for an apically located V-ATPase to actively extrude  $H^+$  into water low in  $Na^+$ . The model creates an electrical gradient for  $Cl^-$ , which exchanged for  $HCO_3^-$  facilitates  $CO_2$  excretion. CA, carbonic anhydrase.

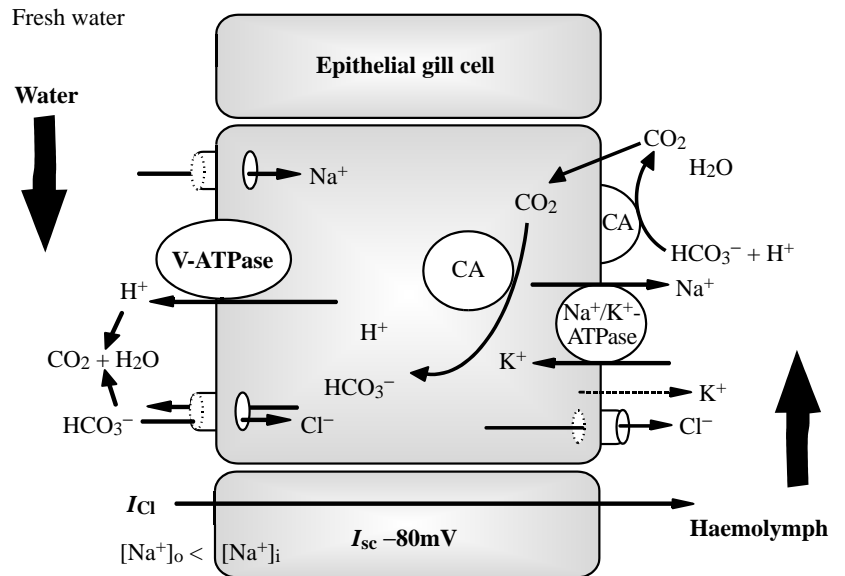

*Eriocheir sinensis* (Onken et al., 1991; Riestenpatt et al., 1994; Onken and Putzenlechner, 1995) all concluded that  $Cl^-$  transport was electrogenic ( $I_{Cl} = -80\text{ mV}$ ) and driven by an apical V-ATPase pumping  $H^+$  into the water independently of  $Na^+$  uptake. These investigators all agreed that the basal  $Na^+/K^+$ -ATPase was important in extruding into the haemolymph  $Na^+$  that entered into the branchial epithelial cells via apical  $Na^+$  channels (Fig. 2). There have been worthwhile attempts to produce models for V-ATPase-supported  $Na^+$  transport, for example in crayfish (Zare and Greenaway, 1998). However, these incorporate spatial separation, into separate cellular compartments, of apical  $Cl^-$  and  $Na^+$  transport and of  $H^+$  extrusion and  $HCO_3^-$  exchange, and thus require considerably more experimental support.

Respiratory gas exchange by aquatic crustaceans is driven primarily by  $O_2$  uptake, and  $CO_2$  excretion occurs primarily as  $HCO_3^-$  through the apical  $HCO_3^-/Cl^-$  exchanger (see Mantel and Farmer, 1983; Truchot, 1983; Henry and Wheatly, 1992, for reviews). In marine crabs the acid-base regulation is carried out by the same posterior gills as employed in ion regulation, while freshwater crabs use all gills (Henry and Wheatly, 1992). The excretion of  $CO_2$  from the haemolymph over the branchial epithelia is facilitated by carbonic anhydrase (CA) (Figs 1, 2). Two populations of CA are involved: one is on the basal membrane to accelerate the dehydration of  $HCO_3^-$  to  $CO_2$ , which diffuses into the cytoplasm, where a second CA population assists the rehydration to  $HCO_3^-$  and  $H^+$  (Henry, 1984; Burnett et al., 1985; Henry, 1988). Thus  $CO_2$  excretion is achieved but also provides the counterions for the  $Cl^-$  and  $Na^+$  exchangers, and manages acid-base balance. There have been a number of demonstrations of this linkage. For example, Henry and Cameron (Henry and Cameron, 1982a; Henry and Cameron, 1982b) showed firstly that *Callinectes sapidus* exposed to dilute water increased haemolymph pH and  $HCO_3^-$  concentration, and secondly, that the activity of CA was elevated in the posterior gills of crabs in dilute water. *C. sapidus*

living in 85% sea water contained CA within gill number 6 capable of producing approximately  $13\text{ mmol } CO_2\text{ g}^{-1}\text{ min}^{-1}$ , whereas those acclimated to 10% sea water could produce almost  $28\text{ mmol } CO_2\text{ g}^{-1}\text{ min}^{-1}$  (Henry and Cameron, 1982b). Essentially the same results were obtained from hyper-regulating *Callinectes similis* in which both the  $Na^+/K^+$ -ATPase and the CA content of posterior, but not anterior, gills increased markedly (Piller et al., 1995). Thus, hyper-regulation requires not only elevated  $Na^+/K^+$ -ATPase but also increased CA to provide counterions, with consequences for acid-base status.

The situation is somewhat different in freshwater crustaceans since not only are all the gills involved in branchial ion exchange but the antennal gland also reabsorbs ions to produce a hypo-ionic urine (Fig. 3). The antennal gland of crayfish is rich in  $Na^+/K^+$ -ATPase and CA (Wheatly and Henry, 1987), which facilitates the ion reabsorption up to threefold greater than unidirectional branchial influx (Wheatly and Toop, 1989). Freshwater brachyurans also show pronounced activity in the antennal gland and, for example, *Potamonautes warreni* excretes less than 5% of the urine produced as a filtrate in the antennal gland and reclaims up to 95% of the urinary salts (Morris and van Aardt, 1998).

Aquatic crustaceans are ammonotelic and excrete  $NH_3/NH_4^+$ , primarily across the gills (see Greenaway, 1991, for a review). At physiological pH, approximately 99% of the ammonia in the haemolymph is as the ion,  $NH_4^+$ , and thus the partial pressure of  $NH_3$  is normally very low. Excretion of nitrogenous waste across the gills as  $NH_4^+$  has immediate implications for both branchial ion exchange and for  $CO_2$ /acid-base status (Fig. 1). The  $NH_3$  is highly soluble and would diffuse easily outward over the gills, but the partial pressure gradient is insufficient to drive significant gaseous excretion. More likely is the substitution of  $NH_4^+$  for  $K^+$  in the basal membrane  $Na^+/K^+$ -ATPase (Towle and Holleland, 1987) so that  $NH_4^+$  is actively moved into the epithelial cell, linking nitrogen excretion to  $Na^+$  regulation (Fig. 1). There is some evidence that the cytosolic  $NH_4^+$  can also substitute for  $H^+$

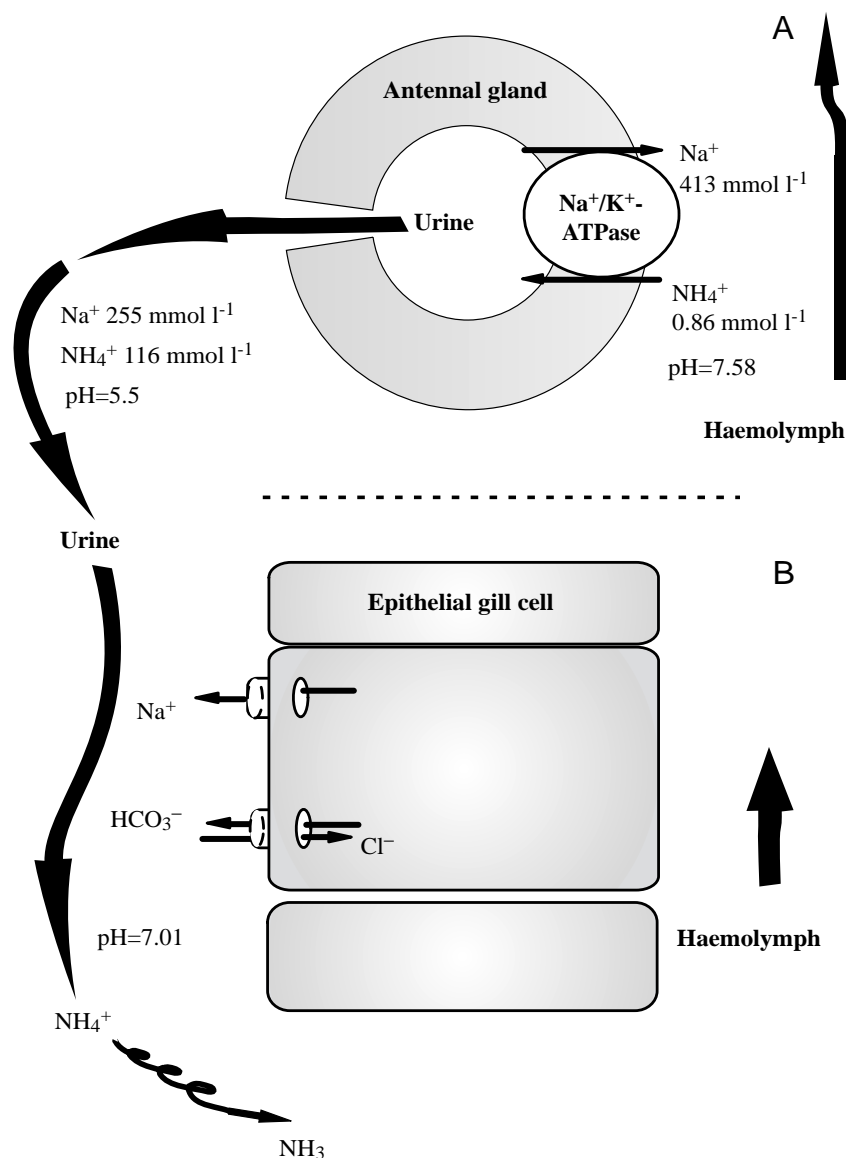

Fig. 3. Two part model. (A) The antennal gland and (B) the branchial epithelial layer. In many freshwater decapods the antennal gland apparently utilises a  $\text{Na}^+/\text{K}^+$ -ATPase to reclaim  $\text{Na}^+$  from the urine and thereby other ions, to produce a hypo-ionic urine. In species such as ghost crabs  $\text{NH}_4^+$  substitutes for the  $\text{K}^+$  and facilitates  $\text{NH}_3$  excretion into an acidic urine, which traps  $\text{NH}_4^+$ . During passage over the gills the transport of base equivalents into the urine raises the pH and promotes the volatilisation of a large part of the  $\text{NH}_4^+$  as  $\text{NH}_3$  at the same time as facilitating  $\text{CO}_2$  excretion (DeVries and Wolcott, 1993; DeVries et al., 1994).

in the apical  $\text{H}^+/\text{Na}^+$  exchangers of marine crabs (e.g. Hunter and Kirschner, 1986) and thereby escape to the water. However, this relies on the entry of  $\text{Na}^+$ , via  $\text{Na}^+$  channels, over the apical membrane. Clearly this is impossible without any extra-corporeal water and at least very difficult in fresh or very dilute sea water with low  $\text{Na}^+$  concentration. Greenaway (Greenaway, 1991) hypothesised on the basis of the findings of Krippeit-Drews et al. (Krippeit-Drews et al., 1989) that the apical  $\text{H}^+$  pump, the V-ATPase, might have a role in freshwater crabs. Thus, the  $\text{H}^+$  excretion required to drive salt uptake could lower the cytosolic availability of  $\text{H}^+$  to the extent that  $\text{NH}_4^+$  could become deprotonated and the diffusive excretion of  $\text{NH}_3$  promoted.

#### Consequences of breathing air and the significance of urine reprocessing

The adoption of air-breathing removes the gills from water and compromises the processes of, and the linkages between,

salt balance,  $\text{CO}_2$  excretion, acid-base balance and nitrogen excretion. Freshwater crustaceans are in many ways 'pre-adapted' to life on land (e.g. Wolcott, 1992). The use of the antennal gland to produce of a hypoionic urine minimises salt loss, while low urine volumes can conserve water (Fig. 3), both of which seem useful attributes for animals moving into air (e.g. Morris and van Aardt, 1998). There remain substantial problems, however, with respect to  $\text{CO}_2$  excretion and the removal of nitrogenous wastes. Marine crabs with their almost complete reliance on branchial processes face additional difficulties of water and salt loss when moved into air.

There is now quite good evidence that progressively more terrestrial crustaceans possess lungs with increasingly higher concentrations of carbonic anhydrase (Randall and Wood, 1981; Morris and Greenaway, 1991; Henry, 1990; Morris et al., 1996). The lungs of crabs are formed from the branchiostegal linings, which have become progressively more vascularised to act as gas exchange organs (see Burggren and McMahon, 1988;



Greenaway and Farrelly, 1990, for reviews). The CA occurs within the membrane (Morris and Greenaway, 1990) and apparently also the cytosol of pulmonary epithelia (Henry, 1991). Terrestrial crabs have elevated haemolymph  $P_{CO_2}$  compared to aquatic species (see Burggren and McMahon, 1988, for a review), but this results from the increased ventilation requirement for  $CO_2$  excretion into air compared to water rather than representing an increased gradient for improved diffusive loss. The rate-limiting step in pulmonary  $CO_2$  excretion would appear to be the conversion of  $HCO_3^-$  to molecular  $CO_2$ , the process catalysed by CA. For example, the CA in cytosol and the cell membranes of the branchiostegal lining of *Callinectes sapidus* turned over approximately  $270\text{--}290\mu\text{mol l}^{-1}\text{CO}_2\text{ min}^{-1}$ , but in *Gecarcinus lateralis* these rates increased to nearly 3000 and  $1800\mu\text{mol l}^{-1}\text{CO}_2\text{ min}^{-1}$ , respectively, and to over  $3000\mu\text{mol l}^{-1}\text{CO}_2\text{ min}^{-1}$  in *Birgus latro* (Henry, 1991). In *Birgus latro*, at least, there is good evidence that  $CO_2$  excretion is moved, in large part, away from the gills to the lungs (Greenaway et al., 1988).

The retention of nitrogenous waste until such time as the crab can immerse is one possibility, and seems to be adopted by species of both marine and freshwater origins. In amphibious river crab *P. warreni* the excretion of nitrogen is clearly as branchial  $NH_4^+$  transport, and during several days of air-breathing N excretion was minimal (Morris and van Aardt, 1998). Similar results have been obtained for *Cardisoma hirtipes* (Dela-Cruz and Morris, 1997) and *Cardisoma carnifex* (Wood et al., 1986). All these species show a pulse of elevated N excretion when immersed. Although the urine of *Cardisoma* may initially contain as much as  $5\text{ mmol l}^{-1}\text{NH}_4^+$ , the release of urine quickly slows to near zero, as part of water conservation, preventing any further excretion. This is not a viable strategy for long-term terrestrial excursions.

Urine represents a major source of salt loss in land crabs (see Greenaway, 1988; Wolcott, 1992, for reviews). Gecarcinid land crabs such as *Gecarcinus lateralis* (Wolcott and Wolcott, 1984) and *Gecarcoidea natalis* and the anomuran *Birgus latro* (Table 1), as well as ghost crabs *Ocypode quadrata* (Wolcott and Wolcott, 1985) all reprocess their primary urine to produce an altered, hypo-osmotic final product 'P'. The urine is passed from the opening of the antennal gland into the branchial chambers where branchial uptake mechanisms reabsorb the required salt (Morris et al., 1991; Taylor et al., 1993; Morris et al., 2000), often lowering the NaCl concentration to 5% of that of the haemolymph. Essentially the ion-exchange mechanisms that were employed by their aquatic ancestors have been modified to conduct similar exchanges with their own urine (Fig. 1).

The primary filtration in the antennal gland and reabsorption in the branchial system is reminiscent of the vertebrate kidney and at least creates the possibility of both  $CO_2$  and  $NH_3^+$  excretion into the urine passing over the gill epithelia (Fig. 1). This strategy is in fact adopted by both *G. lateralis*, which increased the  $NH_4^+$  content of the urine by tenfold as it passed over the gills (Wolcott, 1991), and *G. natalis*, which increased more than 25-fold during urine reprocessing (Greenaway and Nakamura, 1991). Thus,  $NH_4^+$  clearance and salt reclamation

Table 1. The osmotic pressure in the haemolymph, urine and final excretory product of the anomuran *Birgus latro* and brachyuran *Gecarcoidea natalis* land crabs after a week of drinking either fresh water or diluted sea water

|                                         | Osmotic pressure (mosmol l <sup>-1</sup> ) |            |         |                   |
|-----------------------------------------|--------------------------------------------|------------|---------|-------------------|
|                                         | Drinking water                             | Haemolymph | Urine   | Excretory product |
| <i>Birgus latro</i> <sup>a</sup>        | FW                                         | 768±17     | 787±9   | 119±13‡,§         |
|                                         | 60% SW                                     | 821±9*     | 815±19* | 786±25*           |
| <i>Gecarcoidea natalis</i> <sup>b</sup> | FW                                         | 825±17     | 855±19  | 73±18‡,§          |
|                                         | 50% SW                                     | 948±9*     | 992±21* | 392±67*,‡         |

FW, fresh water; SW, sea water.

Values are means ± S.E.M.; N=7 or 8.

\*Effect of drinking water salinity; ‡difference compared to haemolymph; §difference compared to urine.

<sup>a</sup>Taylor et al., 1993; <sup>b</sup>S. Morris, unpublished observations.

are simultaneously facilitated. The same apical gill epithelial exchange systems seem to be used by other terrestrial species such the grapsid *Geograpsus grayi* (Fig. 4). In this species  $Na^+/NH_4^+$  exchange is employed to excrete ammonia into the branchial fluid, the pH of which is then raised, apparently by  $HCO_3^-$  exchanged for  $Cl^-$ , thereby volatilising the ammonia as  $NH_3$  at the same time as excreting  $CO_2$  (Varley and Greenaway, 1994).

While the gecarcinid, grapsid and even freshwater Potamoidea conform to the principle that crabs rely on branchial excretion of  $NH_3/NH_4^+$ , it appears that the ocypodids do not (Fig. 3) (DeVries and Wolcott, 1993; DeVries et al., 1994). Concentrations of  $NH_4^+$  in excess of  $100\text{ mmol l}^{-1}$  have been measured in the urine of *Ocypode quadrata* (DeVries and Wolcott, 1993), which had a pH 5.5 and clearly worked as an acid  $NH_4^+$  trap (DeVries et al., 1994). Furthermore, the  $Na^+/K^+$ -ATPase activity within the antennal gland exceeded that of the gills, while urine  $Na^+$  was markedly lower than  $Cl^-$ , leading DeVries et al. (DeVries et al., 1994) to suggest a  $Na^+$ -dependent trapping of  $NH_4^+$  in the urine (Fig. 3). Subsequent urine reprocessing by the gills resulted in both increased pH and  $CO_2$ , presumably by  $HCO_3^-/Cl^-$  exchange, since  $Cl^-$  concentrations were approximately halved, promoting the excretion of  $CO_2$  and the volatilisation of  $NH_3$  (Fig. 3; DeVries and Wolcott, 1993).

The anomuran Robber crab, *Birgus latro*, also employs branchial reprocessing of urine for salt reclamation (Table 1), but has managed to unlink nitrogen excretion from either branchial or antennal gland processes by becoming almost entirely purinotelic, with faeces containing large amounts of urate and guanine (Greenaway and Morris, 1989; P. Greenaway, personal communication).

#### Control of branchial exchange and the mechanism of regulating urine reprocessing

A number of features of the branchial exchange and excretions processes of air-breathing crabs imply important control and regulation mechanisms. For example, the

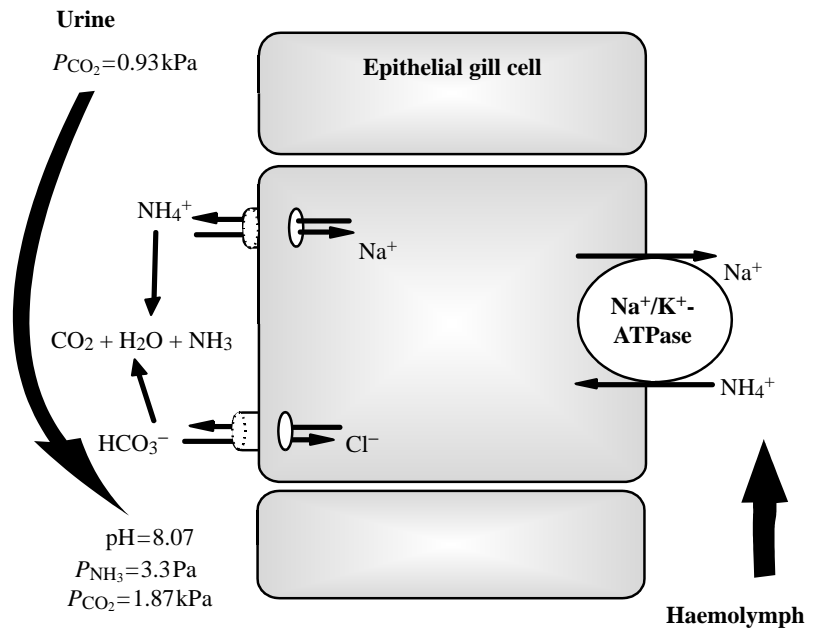

Fig. 4. Demonstrating the putative  $\text{NH}_3$  excretion mechanism in the terrestrial carnivore *Geograpsus grayi*. Urine passed over the gills receives  $\text{NH}_4^+$  in exchange for  $\text{Na}^+$ ; the urine is then alkalised by the addition of  $\text{HCO}_3^-$ , which combines with the  $\text{NH}_4^+$  to volatilise both  $\text{NH}_3$  and  $\text{CO}_2$ . The net result is a final excretory fluid with a high  $P_{\text{CO}_2}$  and  $P_{\text{NH}_3}$  (Varley and Greenaway, 1994).

volatilisation of  $\text{NH}_3$  by *Geograpsus grayi* (Fig. 4) is an acutely discontinuous process (Varley and Greenaway, 1994). Bursts of excretion lasted from 3 h to 3 days, during which ammonia excretion rates exceeded  $200 \mu\text{mol l}^{-1} \text{kg}^{-1} \text{h}^{-1}$  compared to the overall mean rate of  $74 \mu\text{mol l}^{-1} \text{kg}^{-1} \text{h}^{-1}$ . Varley and Greenaway (Varley and Greenaway, 1994) speculate that the nitrogen may be stored as non-toxic amino acids and/or purines, and that its release may be dependent on the provision of  $\text{Na}^+$  and  $\text{Cl}^-$  for branchial exchange. Two conclusions may be drawn: that the process is under control and that  $\text{N}^+$  excretion in this land crab is dependent on the production of a finite volume of urine that is passed over the gills.

The kidney analogue system of land crabs is also under fine control since anomuran and brachyuran land crabs are able to vary the extent of salt reabsorption from the urine as it passes over their gills (Table 1). *B. latro* and *G. natalis* drinking fresh water reclaimed, respectively, 85 % and 95 % of the salt in their urine (Table 1); but given approximately half-strength sea water to drink, these values decline to 4 % and 54 %. Clearly the crabs must be sensitive to their internal ionic status and modify salt reclamation accordingly.

Since Mantel (Mantel, 1985) and Wolcott (Wolcott, 1992) alerted us to a deficit in our understanding of the controls on branchial exchange and salt regulation there have been further concerted efforts to address this question. The nature of the primary and second messengers have been investigated, as have their targets and mechanisms of action, primarily on aquatic species but more recently with respect to the special problems of terrestrial species.

Among the aquatic crabs the marine *C. maenas* and the euryhaline freshwater *E. sinensis* have become almost exclusive models – a situation that needs addressing in wider, more comparative investigation. Pioneering work on *Callinectes sapidus* by Kamemoto and colleagues (e.g.

Kamemoto, 1982; Kamemoto and Oyama, 1985; Lohrmann and Kamemoto, 1987) as well as Mantel (Mantel, 1985) led to a clear appreciation that ionic regulation and the activity of the branchial exchange mechanisms was under neurohormonal control, and most importantly, that the pericardial organs (PO) may be of primary importance (Kamemoto and Oyama, 1985). The POs are neurosecretory axons closely adjacent to the heart, which secrete a variety of monoamines, including dopamine, 5-hydroxytryptamine (5-HT) and octopamine as well as peptide hormones such as proctolin (Stangier et al., 1986) and cardioactive peptide (Stangier et al., 1987) into the haemolymph circulatory system. These same authors (Kamemoto and Oyama, 1985) concluded that dopamine and octopamine might stimulate  $\text{Na}^+$ -uptake by increasing cAMP levels, an effect that has been demonstrated (Lohrmann and Kamemoto, 1987). Neuropeptides may prove to be important, however, since crustacean hyperglycemic hormone has recently been shown to have marked effects on  $\text{Na}^+$  transport in *C. maenas* gills (Spanings-Pierrot et al., 2000).

In *C. maenas* the injection of dopamine ( $10^{-5} \text{mol l}^{-1}$ ) significantly increased the rate constant ( $K$ ) for  $\text{Na}^+$  uptake by 0.09, whereas the injection ( $10^{-6} \text{mol l}^{-1}$ ) of the membrane-permeable cAMP analogue dibutyryl cAMP resulted in an elevation in  $K$  of 0.134, compared to PO extract, which gave a similar increase (0.127) (Sommer and Mantel, 1988). Sommer and Mantel subsequently confirmed the linkage between dopamine and cAMP, since injecting  $10^{-5} \text{mol l}^{-1}$  dopamine promoted an increase of 94 % in the cAMP of *C. maenas* gill tissue (Sommer and Mantel, 1991). Importantly, they also showed 75 % and 135 % increases in cAMP concentration in the gills of *C. maenas* acclimated to 40 % sea water compared to 100 % sea water (Sommer and Mantel, 1991), substantiating neuroendocrine involvement as part of the acute hyper-regulatory response of euryhaline crabs. Similarly, injection of dopamine or dibutyryl-cAMP (db-

cAMP) into the intertidal *Leptograpsus variegatus* increased branchial  $\text{Na}^+/\text{K}^+$ -ATPase 67% and 63%, respectively (Morris and Edwards, 1995). Pre-injection with IMBX (a phosphodiesterase inhibitor) increased the effect of cAMP, consistent with the role cAMP as second messenger, while pre-injection of the dopamine antagonist, butaclamol hydrochloride, reduced  $\text{Na}^+/\text{K}^+$ -ATPase activity from 0.32 to  $0.18 \text{ nmol P}_i \text{ mg}^{-1} \text{ min}^{-1}$  (Morris and Edwards, 1995). *L. variegatus* also appears to rapidly increase  $\text{Na}^+/\text{K}^+$ -ATPase activity utilising dopamine as a primary and cAMP as the intracellular second messenger and it may be that this feature is ubiquitous in the marine brachyurans. However, while recent work (Lucu and Flik, 1999) also established a link between cAMP and gill membrane  $\text{Na}^+/\text{K}^+$ -ATPase in *C. maenas*, it established a negative correlation between cAMP and ATPase activity, which almost doubles in crabs transferred to dilute sea water. These authors (Lucu and Flik, 1999) concluded that for shore crabs "cAMP is involved in  $\text{Na}^+/\text{K}^+$ -ATPase regulation, yet in a diametrically opposite mode in seawater crabs compared to freshwater crabs". This conclusion is generally inconsistent with the previous studies (described above) with respect to the mechanism of action in freshwater crabs.

The studies of the euryhaline Chinese mitten crab, *Eriocheir sinensis*, have provided insight into the mechanism of action, but unfortunately do not reach any general consensus. Detailed investigation of *E. sinensis* gill tissue (Trausch et al., 1989) revealed that the membrane fraction containing  $\text{Na}^+/\text{K}^+$ -ATPase also included dopamine and 5-HT receptors, and that protein phosphorylation, stimulated by the bioamines, occurred only in the presence of the soluble fraction containing a cAMP-dependent protein kinase. Dopamine added to the perfusate of isolated perfused *E. sinensis* gills stimulated  $\text{Na}^+$  flux (Bianchini and Gilles, 1990; Detaille et al., 1992). Bianchini and Gilles demonstrated conclusively that cAMP is implicated in transepithelial NaCl transport with the involvement of a protein kinase (Bianchini and Gilles, 1990). The application of protein kinase C inhibitors increased transepithelial  $\text{Na}^+$  flux by 250% and since there was no effect on basal membrane  $\text{Cl}^-$  flux, this was suggested to be due to effects on the  $\text{Na}^+/\text{K}^+$ -ATPase (Asselbourg et al., 1991). Thus, the prevailing model appeared similar for both hyper-regulating marine and freshwater species (e.g. Fig. 6 of Asselbourg et al., 1991), in which the primary site of action was the basal membrane  $\text{Na}^+/\text{K}^+$ -ATPase, with apical exchange of  $\text{Na}^+$  for  $\text{H}^+$  and  $\text{Cl}^-$  for  $\text{HCO}_3^-$ . However, Bianchini and Gilles recognised some difficulty with this model (Bianchini and Gilles, 1990) since it should have promoted  $\text{K}^+$  transport and depolarisation of the epithelium, not the observed hyperpolarisation.

Introducing an apical V-ATPase for  $\text{H}^+$  excretion in freshwater crabs provides a different indirect control of  $\text{Na}^+$  and  $\text{Cl}^-$  uptake in *E. sinensis*. Riessenpatt et al. (Riessenpatt et al., 1994; Riessenpatt et al., 1995) proposed that net  $\text{Cl}^-$  flux is independent of  $\text{Na}^+$  flux and is an electrogenic transport driven by the V-ATPase. Application of db-cAMP to isolated perfused *E. sinensis* gills promoted an increase in transcellular  $\text{Na}^+$  conductance, not only via increased affinity of apical  $\text{Na}^+$

transport channels but apparently also in their number, without any change in the electromotive force (Riessenpatt et al., 1994). At the same time they (Riessenpatt et al., 1994) suggested that  $\text{Cl}^-$  uptake through  $\text{Cl}^-/\text{HCO}_3^-$  exchange and through the basal  $\text{Cl}^-$  channels is enhanced by the  $\text{H}^+$  extrusion. This addressed the difficulties alluded to by Bianchini and Gilles (Bianchini and Gilles, 1990), but most importantly completely removed the basal  $\text{Na}^+/\text{K}^+$ -ATPase as an important regulatory process and fundamentally questioned the cAMP-mediated phosphorylation of the basal membrane pump as a control mechanism. The nature of the control remains unclear since reexamination of the perfused gills of *E. sinensis* has shown that in  $\text{Cl}^-$ -free media, dopamine or db-cAMP still stimulate  $\text{Na}^+/\text{K}^+$ -ATPase and promoted  $\text{Na}^+$  influx (Mo et al., 1998). This leads to the uncomfortable situation where cAMP may act to induce electrogenic  $\text{Cl}^-$  transport, promote increased affinity and numbers of apical  $\text{Na}^+$  channels, and also stimulate basal  $\text{Na}^+/\text{K}^+$ -ATPase and even basal  $\text{Cl}^-$  channels. Thus, currently the situation remains incompletely resolved.

There is some compelling evidence that the ion-regulatory mechanism may be even more complicated. The pericardial organs, while strongly implicated in hydromineral regulation, are not the only neurohaemal tissues in crabs, and sinus gland of the crustacean eyestalk is an important secretory tissue that has, until very recently, received little attention in this regard (Pierrot et al., 1994; Eckhardt et al., 1995; Spanings-Pierrot et al., 2000). Even simple experiments such as eyestalk ablation show that the sinus gland influences ion balance; for example, in the crayfish *Cherax destructor* the haemolymph  $[\text{Na}^+]$  declined from  $225.9 \pm 1.63$  to  $214 \pm 5.04 \text{ mmol l}^{-1}$  following eyestalk removal (S. Morris, unpublished). The isolated perfused posterior gills from hyper-regulating *Pachygrapsus marmoratus*, when perfused with extracts from the sinus gland, showed an increase in transepithelial difference of approximately 50% and elevated  $\text{Na}^+$  influx by approximately 150% (Pierrot et al., 1994; Eckhardt et al., 1995). In addition, perfusing the gills of *C. sapidus* with sinus gland extracts promoted elevated cGMP but not cAMP (Kamemoto and Oyama, 1985). Sinus gland extracts from *P. marmoratus* were deactivated by enzyme digestion and Eckhardt et al. concluded the active factor is a peptide(s) of  $>5000 \text{ Da}$  that directly influences branchial function (Eckhardt et al., 1995). An osmoregulatory function has now been suggested for crustacean hyperglycaemic hormone (CHH), in addition to its role in regulating haemolymph sugar concentration (Spanings-Pierrot et al., 2000). The CHH fraction isolated from eyestalks of *E. sinensis* meets all the characteristics described previously for a putative peptide, and increased  $\text{Na}^+$  influx by approximately 50% (Spanings-Pierrot et al., 2000). These workers (Spanings-Pierrot et al., 2000) identified a second, much less active, compound and concluded that CHH may constitute a major factor involved in the control of osmoregulation in decapod crustaceans. Thus, there may be a separate and different neuroendocrine control system originating with the sinus gland in addition to that of the POs.

There are a considerable number of terrestrial brachyuran

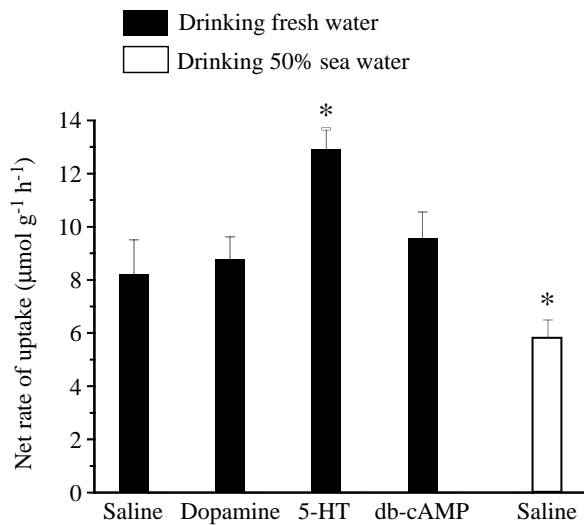

Fig. 5. Net Na<sup>+</sup> uptake by the gills of the Christmas Island red crab *Gecarcoidea natalis* determined by perfusing the branchial chambers with artificial urine (for methods, see Morris et al., 2000). Filled columns are for crabs with a history of drinking fresh water, the normal condition on Christmas Island, and the open column is the rate for crabs after drinking 50% sea water for 3 weeks. Crabs were injected with saline or one of the following: dopamine, 5-hydroxytryptamine (5-HT) ( $10^{-4}$  mol l<sup>-1</sup> at  $1.5 \mu\text{l g}^{-1}$ ) or dibutyl-cAMP (db-cAMP) ( $6 \times 10^{-4}$  mol l<sup>-1</sup> at  $1.5 \mu\text{l g}^{-1}$ ) as indicated ( $N=6$ ). An asterisk indicates a value significantly different from saline control animals drinking fresh water. Values are means  $\pm$  S.E.M.

crabs but *Birgus latro* is the sole truly terrestrial anomuran, since the coenobitid hermit crabs rely to a varying extent on the mollusc shells they inhabit. Contemporary investigations of neuroendocrine regulation of hydromineral balance are limited to the brachyuran Christmas Island land crab, *Gecarcoidea natalis* (S. Morris, unpublished) and *Birgus latro* (Morris et al., 2000). Clearly these animals can control ion resorption from their urine (Table 1) and in so much as they employ their gills for this purpose then the regulatory systems of the aquatic ancestors may remain available to them.

*G. natalis* provided with 50% sea water to drink decrease the net branchial uptake of Na<sup>+</sup> from an artificial urine passed over their gills by 29% (Fig. 5; for Materials and methods see Morris et al., 2000), but this appears to have little to do with any change in Na<sup>+</sup>/K<sup>+</sup>-ATPase activity, which remains constant (Fig. 6). The crabs in these experiments were acclimated for 3 weeks to the saline drinking water and a possible conclusion is that long-term changes in Na<sup>+</sup> uptake are governed by an adjustable Na-permeable of the gill epithelia, i.e. crabs with excess dietary salt become more leaky. The branchial uptake mechanisms of *G. natalis* do respond to neurohormonal stimulation, but unlike *Carcinus* (e.g. Sommer and Mantel, 1991) and *Eriocheir* (e.g. Mo et al., 1998) neither dopamine (primary messenger) nor cAMP (secondary messenger) had any effect, whereas 5-HT markedly stimulated both net Na<sup>+</sup>-uptake (Fig. 5) and Na<sup>+</sup>/K<sup>+</sup>-ATPase activity (Fig. 6). The influence of 5-HT is not limited to the branchial uptake

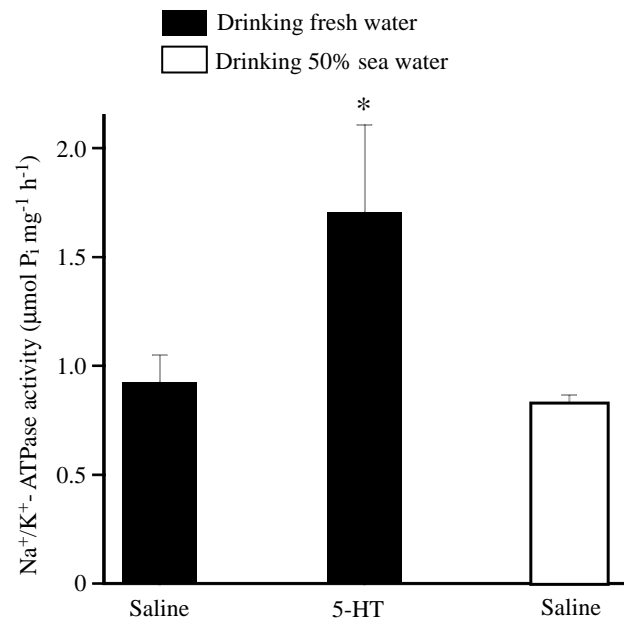

Fig. 6. Branchial Na<sup>+</sup>/K<sup>+</sup>-ATPase activity in *Gecarcoidea natalis* after 3 weeks of drinking fresh water (filled columns) or 50% sea water (open columns). Crabs were injected with either saline or 5-hydroxytryptamine (5-HT) ( $10^{-4}$  mol l<sup>-1</sup> at  $1.5 \mu\text{l g}^{-1}$ ) ( $N=6$ ). An asterisk indicates a rate significantly greater than the control rate (for methods, see Morris et al., 2000). Values are means  $\pm$  S.E.M.

mechanisms but also stimulates primary urine production, regardless of whether the crab has been provided with drinking water or not (Fig. 7). Depriving the crabs of drinking water reduced urine production by 30%, but injecting 5-HT ( $10^{-4}$  mol l<sup>-1</sup> at  $1.5 \mu\text{l g}^{-1}$ ; approximate initial circulating concentrations,  $4 \times 10^{-7}$  mol l<sup>-1</sup>) stimulated clearance by 18% in crabs with drinking water and by 21% in crabs deprived of water for 3 days (Fig. 7). Thus, in this brachyuran land crab at least, acute adjustments in urine reprocessing can be induced by 5-HT, although the second messenger is not cAMP, which also stimulates urine production. Thus *G. natalis* branchial uptake is submaximal, even when on a normal freshwater drinking supply, but can be increased by stimulating the branchial ATPase. However, long-term adjustments to a relative surfeit of dietary salt seem to be managed by adjusting Na<sup>+</sup> loss rates across the gill epithelium into the urine.

The terrestrial anomuran *Birgus latro* reabsorbs urinary salts, apparently like *G. natalis*, but detailed investigations have revealed fundamental differences in the regulatory processes (Morris et al., 2000). Branchial Na<sup>+</sup> and Cl<sup>-</sup> uptake across the gill epithelium of *B. latro* is regulated by dopamine, mediated by cAMP, but importantly this signal causes a decrease in uptake (Morris et al., 2000). For example, dopamine ( $2 \times 10^{-4}$  mol l<sup>-1</sup> at  $1.5 \mu\text{l g}^{-1}$ ) reduced Cl<sup>-</sup> uptake by 45% while db-cAMP ( $6 \times 10^{-4}$  mol l<sup>-1</sup> at  $1.5 \mu\text{l g}^{-1}$ ) depressed Na<sup>+</sup> uptake by 84%. Injection of dopamine in *B. latro* elevated endogenous branchial cAMP by 132% from 164 pmol g<sup>-1</sup> fresh water to 381 pmol g<sup>-1</sup> fresh water (Morris et al., 2000). While the mechanism of action was to modulate the activity of



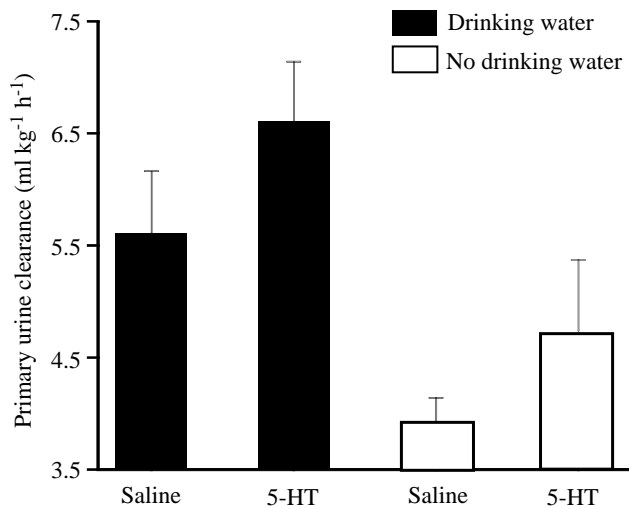

Fig. 7. Primary urine production by *Gecarcoidea natalis* provided with drinking water (filled columns) or deprived of water for 3 days (open columns). The crabs were maintained under field conditions on Christmas Island and were injected with saline or 5-hydroxytryptamine (5-HT) ( $6 \times 10^{-4} \text{ mol l}^{-1}$  at  $1.5 \mu\text{l g}^{-1}$ ) every 8 h for 3 days. The urine production rate was determined by the clearance of [<sup>57</sup>Cr]EDTA (for methods see Morris and van Aardt, 1998) ( $N=8$ ). Values are means  $\pm$  S.E.M.

$\text{Na}^+/\text{K}^+$ -ATPase, as found in aquatic brachyuran crabs (see above; but except for Lucu and Flik, 1999), the direction of modulation was negative. In *B. latro* db-cAMP reduced  $\text{Na}^+/\text{K}^+$ -ATPase activity by 63% (Morris et al., 2000). Branchial salt uptake in *Birgus* on a normal regime of drinking fresh water is thus considerably above the minimal rate and when supplied by a surfeit of dietary salt, modulates uptake by a negative signal to the basal  $\text{Na}^+/\text{K}^+$ -ATPase and branchial pumping. Thus in the anomuran land crab, urine reprocessing occurs through branchial mechanisms apparently similar to brachyuran land crabs, but which at a cellular level operate in a direction generally opposite those of the other crabs.

Currently it appears that the brachyuran land crabs, of marine origin, have largely inherited and modified the branchial uptake systems of their aquatic ancestors, to provide a filtration-resorption system analogous to a kidney. This branchial exchange and salt regulation is linked in many air-breathing species to facilitate  $\text{CO}_2$  excretion and both acid-trapping and volatilisation of excretory  $\text{NH}_3$ . The ion regulation systems of the freshwater Brachyura, notably the active role of the antennal gland, seem important in minimising both urinary water and salt loss but do not appear to provide a kidney analogue in freshwater land crabs. There are currently no published data suggesting hormonal control in antennal gland functioning. The anomuran land crabs with an evolutionary history separate from the brachyuran land crabs, typified by *Birgus latro*, employ a generally similar branchial regulation, but the second message determining ATPase activity is opposite to that in brachyuran land crabs. Importantly, the information obtained from these crustacean studies supports and reinforces the premise (the Malpighian

tubule system of the uniramia notwithstanding) that successful evolution of life on land requires a kidney type system capable of managing  $\text{CO}_2$  and  $\text{NH}_3$  movements, as adjuncts to acid-base control – without excess loss of water and under fine hormonal regulation.

This was written as a tribute to Prof. Jean-Paul Truchot on the occasion of his birthday and retirement, and is dedicated to the memory of Dr Holger Rumpff, without whom and without his support, encouragement and friendship, much of the work on Christmas Island would never have been possible. Thanks go also to the Government Conservators and Staff of Parks Australia (Christmas Island).

## References

- Asselbourg, V., Trausch, G., Gilles, R. and Devos, P. (1991). Protein kinase C and ion transport in the posterior gills of the chinese crab *Eriocheir sinensis*. *Mar. Biol.* **109**, 115–119.
- Bianchini, A. and Gilles, R. (1990). Cyclic AMP as a modulator of  $\text{NaCl}$  transport in gills of the euryhaline Chinese crab *Eriocheir sinensis*. *Mar. Biol.* **104**, 191–195.
- Bliss, D. E. (1968). Transition from water to land in decapod crustaceans. *Amer. Zool.* **8**, 355–392.
- Burggren, W. W. and McMahon, B. R. (1988). Circulation. In *Biology of the Land Crabs* (ed. W. W. Burggren and B. R. McMahon), pp. 298–332. New York: Cambridge University Press.
- Burnett, L. E., Dunn, T. N. and Infantino, R. L. (1985). The function of carbonic anhydrase in crustacean gills. In *Transport Processes, Iono- and Osmoregulation* (ed. R. Gilles and M. Gilles-Baillien), pp. 159–168. Berlin: Springer Verlag.
- Charmantier, G., Charmantier-Daures, M. and Aiken, D. E. (1984). Neuroendocrine control of hydromineral regulation in the American lobster, *Homarus americanus* (H. Milne-Edwards, 1837) (Crustacea, Decapoda). 1. Juveniles. *Gen. Comp. Endocrinol.* **54**, 8–19.
- Cooper, A. R. and Morris, S. (1997). Osmotic and ionic regulation by *Leptograpsus variegatus* during hyposaline exposure and in response to emersion. *J. Exp. Mar. Biol. Ecol.* **214**, 263–282.
- Corotto, F. S. and Holliday, C. W. (1996). Branchial  $\text{Na}, \text{K}$ -ATPase and osmoregulation in the purple shore crab, *Hemigrapsus nudus* (Dana). *Comp. Biochem. Physiol.* **113A**, 361–368.
- Dela-Cruz, J. and Morris, S. (1997). Water and ion balance and nitrogenous excretion as limitations to terrestrial excursion in the Christmas Island blue crab, *Cardisoma hirtipes* (Dana). *J. Exp. Zool.* **279**, 537–548.
- Detaille, D., Trausch, G. and Devos, P. (1992). Dopamine as a modulator of ionic transport and glycolytic fluxes in the gills of the Chinese crab, *Eriocheir sinensis*. *Comp. Biochem. Physiol.* **103C**, 521–526.
- De Vries, M. C. and Wolcott, D. L. (1993). Gaseous ammonia evolution is coupled to reprocessing of urine at the gills of ghost crabs. *J. Exp. Zool.* **267**, 97–103.
- De Vries, M. C., Wolcott, D. L. and Holliday, C. W. (1994). High ammonia and low pH in the urine of the Ghost Crab, *Ocypode quadrata*. *Biol. Bull.* **186**, 342–348.
- Eckhardt, E., Pierrot, C., Thuet, P., Van Herp, F., Charmantier-Daures, M., Trilles, J. P. and Charmantier, G. (1995). Stimulation of osmoregulating processes in the perfused gill of the

- crab *Pachygrapsus marmoratus* (Crustacea, Decapoda) by a sinus gland peptide. *Gen. Comp. Endocrinol.* **99**, 169–177.
- Farrelly, C. A. and Greenaway, P.** (1987). The morphology and vasculature of the lungs and gills of the Soldier Crab, *Mictyris longicarpus* (Latreille). *J. Morph.* **193**, 285–304.
- Farrelly, C. A. and Greenaway, P.** (1993). Land crabs with smooth lungs: Grapsidae, Gecarcinidae, and Sundathelphusidae ultrastructure and vasculature. *J. Morph.* **215**, 245–260.
- Greenaway, P.** (1988). Ion and water balance. In *The Biology of Land crabs* (ed. W. W. Burggren and B. R. McMahon), pp. 211–248. New York: Cambridge University Press.
- Greenaway P.** (1994). Salt and water balance in field populations of the terrestrial crab *Gecarcoidea natalis*. *J. Crust. Biol.* **14**, 438–453.
- Greenaway, P.** (1991). Nitrogenous excretion in aquatic and terrestrial Crustacea. *Mem. Qld. Mus.* **31**, 215–227.
- Greenaway, P. and Farrelly, C. A.** (1990). Vasculature of the gas-exchange organs in air-breathing brachyurans. *Physiol. Zool.* **63**, 117–139.
- Greenaway P. and Morris, S.** (1989). Adaptations to a terrestrial existence by the Robber Crab, *Birgus latro*. III. Nitrogenous excretion. *J. Exp. Biol.* **143**, 333–346.
- Greenaway P., Morris, S. and McMahon, B. R.** (1988). Adaptations to a terrestrial existence by the Robber Crab *Birgus latro*. II. In vivo respiratory gas exchange and transport. *J. Exp. Biol.* **140**, 493–509.
- Greenaway, P. and Nakamura, T.** (1991). Nitrogenous excretion in two terrestrial crabs *Gecarcoidea natalis* and *Geograpsus grayi*. *Physiol. Zool.* **64**, 767–786.
- Hartnoll, R. G.** (1988). Evolution, systematics and geographical distribution. In *Biology of the Land Crabs* (ed. W. W. Burggren and B. R. McMahon), pp. 6–51. New York: Cambridge University Press.
- Henry, R. P.** (1984). The role of carbonic anhydrase in blood ion and acid–base regulation. *Amer. Zool.* **24**, 241–251.
- Henry, R. P.** (1988). Multiple functions of carbonic anhydrase in the crustacean gill. *J. Exp. Zool.* **248**, 19–24.
- Henry, R. P.** (1991). Branchial and branchiostegite carbonic anhydrase in decapod crustaceans: The aquatic to terrestrial transition. *J. Exp. Zool.* **259**, 294–303.
- Henry, R. P. and Cameron, J. N.** (1982a). Acid–base balance in *Callinectes sapidus* during acclimation from high to low salinity. *J. Exp. Biol.* **101**, 255–264.
- Henry, R. P. and Cameron, J. N.** (1982b). The distribution and partial characterization of carbonic anhydrase in selected aquatic and terrestrial decapod crustaceans. *J. Exp. Zool.* **221**, 309–321.
- Henry, R. P. and Wheatly, M. J.** (1992). Interaction of respiration, ion regulation and acid–base balance in the everyday life of aquatic crustaceans. *Amer. Zool.* **32**, 407–416.
- Hunter, K. C. and Kirschner, L. B.** (1986). Sodium absorption coupled to ammonia excretion in osmoconforming marine invertebrates. *Am. J. Physiol.* **251**, R957–R962.
- Kamemoto, F. I.** (1982). Crustacean neuropeptides and osmoregulation. In *Neurosecretion: Molecules, Cells, Systems* (ed. D. S. Farmer and K. Lederis), pp. 329–335. New York: Plenum.
- Kamemoto, F. I. and Oyama, S. N.** (1985). Neuroendocrine influence on effector tissues of hydromineral balance in crustaceans. In *Proc. 9th Int. Symp. Comp. Endocrinol.* (ed. B. Lofts), pp. 883–886. Hong Kong: Hong Kong University Press.
- Krippeit-Drews, P., Drews, G. and Graszynski, K.** (1989). Effects of ion substitution on the transepithelial potential difference of the gills of the fiddler crab *Uca tangeri*: evidence for a  $H^+$ -pump in the apical membrane. *J. Comp. Physiol.* **159B**, 43–49.
- Lohrmann, D. M. and Kamemoto, F. I.** (1987). The effect of dibutyryl cAMP on sodium uptake by isolated perfused gills of *Callinectes sapidus*. *Gen. Comp. Endocrinol.* **65**, 300–305.
- Lucu, C.** (1990). Ionic regulatory mechanisms in crustacean gill epithelia. *Comp. Biochem. Physiol.* **97A**, 297–306.
- Lucu, C. and Flik, G.** (1999).  $Na^+K^+$ ATPase and  $Na^+/Ca^{2+}$  exchange activities in gills of hyperregulating *Carcinus maenas*. *Am. J. Physiol.* **45**, R490–R499.
- Mantel, L. H.** (1985). Neurohormonal integration of osmotic and ionic regulation. *Amer. Zool.* **25**, 253–263.
- Mantel, L. H. and Farmer, L. L.** (1983). Osmotic and ionic regulation. In *The Biology of Crustacea* vol. 5: *Internal Anatomy and Physiological Regulation* (editor-in-chief, D. E. Bliss), pp. 53–161. New York: Academic Press.
- Mo, J. L., Devos, P. and Trausch, G.** (1998). Dopamine as a modulator of ionic transport and  $Na^+/K^+$ -ATPase activity in the gills of the Chinese crab *Eriocheir sinensis*. *J. Crust. Biol.* **18**, 442–448.
- Morris, S.** (1991) Respiratory gas exchange and transport in crustaceans: ecological determinants. *Mem. Qld. Mus.* **31**, 241–261.
- Morris, S. and Edwards, T.** (1995). Control of osmoregulation via regulation of  $Na^+/K^+$ -ATPase activity in the amphibious purple shore crab *Leptograpsus variegatus*. *Comp. Biochem. Physiol.* **112C**, 129–136.
- Morris, S. and Greenaway, P.** (1990). Adaptations to a terrestrial existence in the Robber Crab, *Birgus latro* VI. The activity of carbonic anhydrase in the gills and lungs. *J. Comp. Physiol.* **160B**, 217–221.
- Morris S., Greenaway, P., Adamczewska, A. M. and Ahern, M. D.** (2000). Adaptations to a terrestrial existence in the Robber Crab *Birgus latro* L. IX. Hormonal control of post-renal urine reprocessing and salt balance in the branchial chamber. *J. Exp. Biol.* **203**, 389–396.
- Morris, S., Greenaway, P. and McMahon, B. R.** (1996). Air breathing by the purple shore crab, *Hemigrapsus nudus* (Dana). 2. Respiratory gas and acid–base status in response to emersion. *Physiol. Zool.* **69**, 806–838.
- Morris, S., Taylor, H. H. and Greenaway, P.** (1991). Adaptations to a terrestrial existence by the robber crab *Birgus latro*. VII. The branchial chamber and its role in urine reprocessing. *J. Exp. Biol.* **161**, 315–331.
- Morris, S. and van Aardt, W. J.** (1998). Salt and water relations, and nitrogen excretion, in the amphibious african freshwater crab *Potamonautes warreni* in water and in air. *J. Exp. Biol.* **201**, 883–893.
- Onken, H., Graszynski, K. and Zeiske, W.** (1991).  $Na^+$ -independent, electrogenic  $Cl^-$  uptake across the posterior gills of the Chinese crab (*Eriocheir sinensis*): Voltage-clamp and microelectrode studies. *J. Comp. Physiol.* **161B**, 293–301.
- Onken, H. and Putzenlechner, M.** (1995). A V-ATPase drives active, electrogenic and  $Na^+$ -independent  $Cl^-$  absorption across the gills of *Eriocheir sinensis*. *J. Exp. Biol.* **198**, 767–774.
- Péqueux, A. and Gilles, R.** (1988). NaCl transport in gills and related structures. In *Comp. Environ. Physiol.* vol. 1. *NaCl Transport in Epithelia* (ed. R. Gregor), pp. 2–73, Springer-Verlag, Berlin.
- Péqueux, A. and Gilles, R.** (1988). The transepithelial potential difference of isolated perfused gills of the Chinese crab *Eriocheir sinensis* acclimated to fresh water. *Comp. Biochem. Physiol.* **89A**, 163–172.
- Pierrot, C., Eckhardt, E., Van Herp, F., Charmantier-Daures, M., Charmantier, G., Trilles, J. P. and Thuet, P.** (1994). Effect of

- sinus gland extracts on the osmoregulatory physiology of perfused gills from the crab *Pachygrapsus marmoratus*. *C. r. Acad. Sci. Ser. III Sci. Vie* **317**, 411–418.
- Piller, S. C., Henry, R. P., Doeller, J. E. and Kraus, D. W.** (1995). A comparison of the gill physiology of two euryhaline crab species, *Callinectes sapidus* and *Callinectes similis*: energy production, transport-related enzymes and osmoregulation as a function of acclimation salinity. *J. Exp. Biol.* **198**, 349–358.
- Randall, R. J. and Wood, C. W.** (1981). Carbon dioxide excretion in the land crab (*Cardisoma carnifex*). *J. exp. Zool.* **218**, 37–44.
- Riestenpatt, S., Zeiske, W. and Onken, H.** (1994). Cyclic AMP stimulation of electrogenic uptake of Na<sup>+</sup> and Cl<sup>−</sup> across the gill epithelium of the Chinese crab *Eriocheir sinensis*. *J. Exp. Biol.* **188**, 159–174.
- Riestenpatt S., Petrausch G. and Siebers, D.** (1995). Cl<sup>−</sup> influx across posterior gills of the Chinese crab (*Eriocheir sinensis*) – potential energization by a V-type H<sup>+</sup>-ATPase. *Comp. Biochem. Physiol.* **110A**, 235–241.
- Savage, J. P. and Robinson, G. D.** (1983). Inducement of increased gill Na<sup>+</sup>-K<sup>+</sup> ATPase activity by a hemolymph factor in hyperosmoregulating *Callinectes sapidus*. *Comp. Biochem. Physiol.* **75A**, 65–69.
- Sommer, M. J. and Mantel, L. H.** (1988). Effect of dopamine, cyclic AMP, and pericardial organs on sodium uptake and Na/K-ATPase activity in gills of the green crab *Carcinus maenas* (L.). *J. Exp. Zool.* **248**, 272–277.
- Sommer, M. J. and Mantel, L. H.** (1991). Effects of dopamine and acclimation to reduced salinity on the concentration of cyclic AMP in the gills of the green crab, *Carcinus maenas* (L.). *Gen. Comp. End.* **82**, 364–368.
- Spanings-Pierrot, C., Soye, D., Van Herp, F., Gompel, M., Skaret, G., Grousset, E. and Charmantier, G.** (2000). Involvement of crustacean hyperglycemic hormone in the control of gill ion transport in the crab *Pachygrapsus marmoratus*. *Gen. Comp. Endocrinol.* **119**, 340–350.
- Stangier, J., Dirksen, H. and Keller, R.** (1986). Identification and immunocytochemical localization of proctolin in the pericardial organs of the shore crab *Carcinus maenas*. *Peptides* **7**, 67–72.
- Stangier, J., Hilbich, C., Beyreuther, K. and Keller, R.** (1987). Unusual cardioactive peptide (CCAP) from the pericardial organs of the shore crab *Carcinus maenas*. *Proc. Natl. Acad. Sci. USA* **84**, 575–579.
- Taylor, H. H., Greenaway, P. and Morris, S.** (1993). Adaptations to a terrestrial existence by the Robber Crab *Birgus latro* L. VIII. Osmotic and ionic regulation on freshwater and saline drinking regimens. *J. Exp. Biol.* **179**, 93–113.
- Towle, D. W. and Holleland, T.** (1987). Ammonium ion substitutes for K<sup>+</sup> in ATP-dependent Na<sup>+</sup> transport by basolateral membrane vesicles. *Am. J. Physiol.* **252**, R479–R489.
- Trausch, G., Forget, M. C. and Devos, P.** (1989). Bioamine-stimulated phosphorylation and (Na<sup>+</sup>,K<sup>+</sup>)-ATPase in the gills of the Chinese crab, *Eriocheir sinensis*. *Comp. Biochem. Physiol.* **94B**, 487–492.
- Truchot, J. P.** (1983). Regulation of acid–base balance. In *The Biology of the Crustacea*, vol 5. *Internal Anatomy and Physiological Regulation* (ed. L. H. Mantel), pp. 431–457. New York: Academic Press.
- Varley, D. G. and Greenaway, P.** (1994). Nitrogenous excretion in the terrestrial carnivorous crab *Geograpsus grayi*: site and mechanism of excretion. *J. Exp. Biol.* **190**, 179–193.
- Wheatly, M. G. and Henry, R. P.** (1987). Branchial and antennal gland Na<sup>+</sup>/K<sup>+</sup> dependent ATPase and carbonic anhydrase activity during salinity acclimation of the euryhaline crayfish *Pacifastacus leniusculus*. *J. Exp. Biol.* **133**, 73–86.
- Wheatly, M. G. and Toop, T.** (1989). Physiological responses of the crayfish *Pacifastacus leniusculus* to environmental hyperoxia. II. Role of the antennal gland in acid–base and ion regulation. *J. Exp. Biol.* **143**, 53–70.
- Wolcott, D. L.** (1991). Nitrogen excretion is enhanced during urine recycling in two species of terrestrial crab. *J. Exp. Zool.* **259**, 181–187.
- Wolcott, T.** (1992). Water and solute balance in the transition to land. *Amer. Zool.* **32**, 370–381.
- Wolcott, T. G. and Wolcott, D. L.** (1984). Extra-renal urine modification for salt conservation in the land crab *Cardisoma guanhumi*. *Amer. Zool.* **24**, 78A.
- Wolcott, T. G. and Wolcott, D. L.** (1985). Extrarenal modification of urine for ion conservation in ghost crabs, *Ocypode quadrata* Fabricius. *J. Exp. Mar. Biol. Ecol.* **91**, 93–107.
- Wolcott, T. G. and Wolcott, D. L.** (1991). Ion conservation and reprocessing of urine in the land crab *Gecarcinus lateralis*. *Physiol. Zool.* **64**, 344–361.
- Wood, C. M., Boutilier, R. G. and Randall, D. J.** (1986). The physiology of dehydration stress in the land crab, *Cardisoma carnifex*: respiration, ionoregulation, acid-base balance and nitrogenous waste excretion. *J. Exp. Biol.* **126**, 271–296.
- Zare, S. and Greenaway, P.** (1998). Ion transport and the effects of moulting in the freshwater crayfish *Cherax destructor* (Decapoda, Parastacidae). *Aust. J. Zool.* **45**, 539–551.
